# Supplementary material
Source: MDPI journal article supplement (https://www.mdpi.com/search?q=sustainability-12-01461)
Supplement: s001 [file sustainability-12-01461-s001.pdf]

# Supplementary Material for the article “Representation and Preservation of Heritage Crafts”

Xenophon Zabulis <sup>1</sup>, Carlo Meghini <sup>3</sup>, Nikolaos Partarakis <sup>1</sup>, Cynthia Beisswenger <sup>7</sup>, Arnaud Dubois <sup>6</sup>, Maria Fasoula <sup>4</sup>, Vito Nitti <sup>5</sup>, Stavroula Ntoa <sup>1</sup>, Iliia Adami <sup>1</sup>, Antonios Chatziantoniou <sup>1</sup>, Valentina Bartalesi <sup>3</sup>, Daniele Metilli <sup>3</sup>, Nikolaos Stivaktakis <sup>1</sup>, Nikolaos Patsiouras <sup>1</sup>, Paraskevi Doulgeraki <sup>1</sup>, Effie Karuzaki <sup>1</sup>, Evropi Stefanidi <sup>1,2</sup>, Ammar Qammaz <sup>1,2</sup>, Danae Kaplanidi <sup>4</sup>, Ilka Neumann-Janßen <sup>7</sup>, Ulrike Denter <sup>7</sup>, Hansgeorg Hauser <sup>7</sup>, Argyro Petraki <sup>1</sup>, Ioannis Stivaktakis <sup>1,2</sup>, Eleni Mantinaki <sup>1,2</sup>, Anastasia Rigaki <sup>1,2</sup> and George Galanakis <sup>1,2</sup>

- <sup>1</sup> Institute of Computer Science, Foundation for Research and Technology (ICS-FORTH), N. Plastira 100, Vassilika Vouton, GR-700 13 Heraklion, Crete, Greece; partarak@ics.forth.gr (N.P.); stant@ics.forth.gr (S.N.); iadami@ics.forth.gr (I.A.); hatjiant@ics.forth.gr (A.C.); nstivaktak@ics.forth.gr (N.S.); patsiouras@ics.forth.gr (N.P.); vdoulger@ics.forth.gr (P.D.); karuzaki@ics.forth.gr (E.K.); evropi@ics.forth.gr (E.S.); ammarkov@ics.forth.gr (A.O.); argpet@ics.forth.gr (A.P.); johnstiv@ics.forth.gr (I.S.); csd3566@csd.uoc.gr (E.M.); rigaki@ics.forth.gr (A.R.); ggalan@ics.forth.gr (G.G.)
- <sup>2</sup> Computer Science Department, University of Crete, Voutes Campus, 700 13 Heraklion Crete, Greece
- <sup>3</sup> Istituto di Scienza e Tecnologie della Informazione (ISTI), Consiglio Nazionale delle Ricerche (CNR), Area della Ricerca CNR, via G. Moruzzi 1, 56124 Pisa, Italy; carlo.meghini@isti.cnr.it (C.M.); valentina.bartalesi@isti.cnr.it (V.B.); metilli@isti.cnr.it (N.M.)
- <sup>4</sup> Piraeus Bank Group Cultural Foundation, 6 Ang. Gerontas St., 105 58 Athens, Greece; FasoulaM@piraeusbank.gr (M.F.); danae.kaplanidi@gmail.com (D.K.)
- <sup>5</sup> Imaginary, Piazza Caiazzo, 3 20124 Milano (MI), Italy; vito.nitti@i-maginary.it
- <sup>6</sup> Histoire des technosciences en société, Conservatoire national des arts et métiers (HT2S-CNAM), Case 1LAB10, 2 rue Conté, 75003 Paris, France; arnaud64.dubois@gmail.com
- <sup>7</sup> Förderverein Haus der Seidenkultur (HdS), Paramentenweberei Hubert Gotzes e.V., Luisenstraße 15, 47799 Krefeld, Germany; cynthia.beisswenger@seidenkultur.de (C.B.); ilka.neumann88@googlemail.com (I.N.-J.); museum@seidenkultur.de (U.D.); hhf38kr@gmail.com (H.H.)
- \* Correspondence: zabulis@ics.forth.gr

<http://www.mingei-project.eu/pottery-experience-keramion/>.

**Webpage S1.** The demonstration web page for pottery at Margarites.

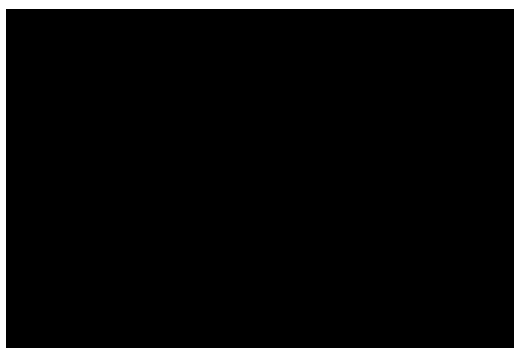

**Video S2.** The mastic application demonstration.

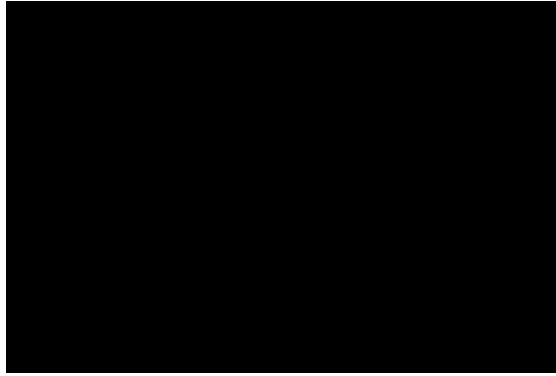

**Video S3.** The Krefeld game demonstration.

<https://drive.google.com/open?id=1BSzZ11JANAOPqwa-eB0yaUDHDqHzlu1&usp=sharing>

**Webpage S4.** The Krefeld Silk City Tour Map.

<https://openseadragon.github.io/openseadragonizer/?img=http%3A%2F%2F139.91.186.146%2Fmedia%2Fmulti-scale%2Ftextile%2F6.png&encoded=true>

**Webpage S5:** Textile magnification demonstrator.

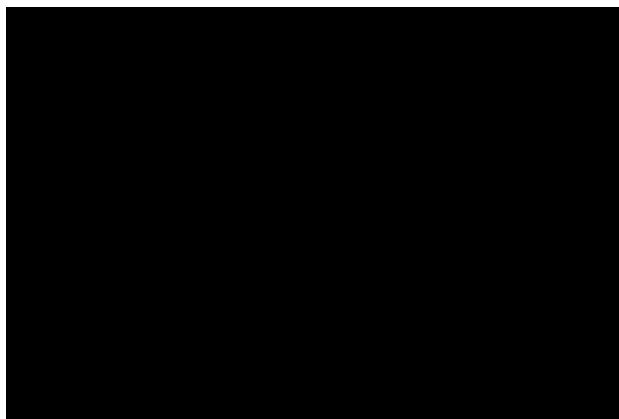

**Video S6.** 3D reconstruction of Sleeping Female Figure. Recorded on November 2019, at Athens, Greece. It is the "Sleeping Female Figure" (1877), by sculptor Yannoulis Chalepas (1851-1938).

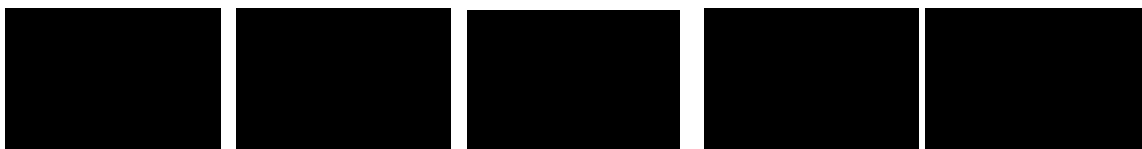

- (a) Mastic museum      (b) Pyrgi      (c) Olympoi      (d) Mesta      (e) Elata

**Video S7.** The 3D rural reconstruction videos of mastic museum and mastic villages Pyrgi, Olympoi, Mesta, Elata.
